# Supplementary material for: Transmigration of magnetite nanoparticles across the blood–brain barrier in a rodent model: influence of external and alternating magnetic fields
Source: Royal Society of Chemistry journal article supplement (doi:10.1039/d2nr02210a), 2022-01-01
Supplement: d2nr02210a1.pdf [file d2nr02210a1.pdf]

## Supporting Information

### **Transmigration of magnetite nanoparticles across the blood-brain barrier in a rodent model: Influence of external and alternating magnetic field**

Ruby Gupta<sup>a</sup>, Anjali Chauhan<sup>a,b</sup>, Tashmeen Kaur<sup>a</sup>, Bijoy K. Kuanr<sup>b</sup>, Deepika Sharma<sup>a\*</sup>

<sup>a</sup>Institute of Nano Science and Technology, Knowledge City, Sector 81, Mohali, Punjab-140306, India

<sup>b</sup>Special Centre for Nanoscience, Jawaharlal Nehru University, New Delhi-110067, India

\*Corresponding Author: [deepika@inst.ac.in](mailto:deepika@inst.ac.in)

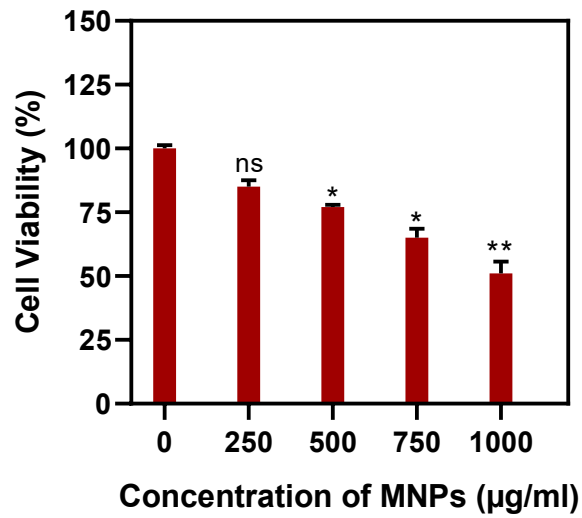

**Figure S1:** Biocompatibility of the developed MNPs on rat brain bEnd.3 cells (unpaired t test was performed; data represented as mean  $\pm$  standard error of the mean; ns represents non-significant; \* $p < 0.01$ , \*\* $p < 0.05$  were considered statistically significant compared to 0  $\mu\text{g/ml}$ ).

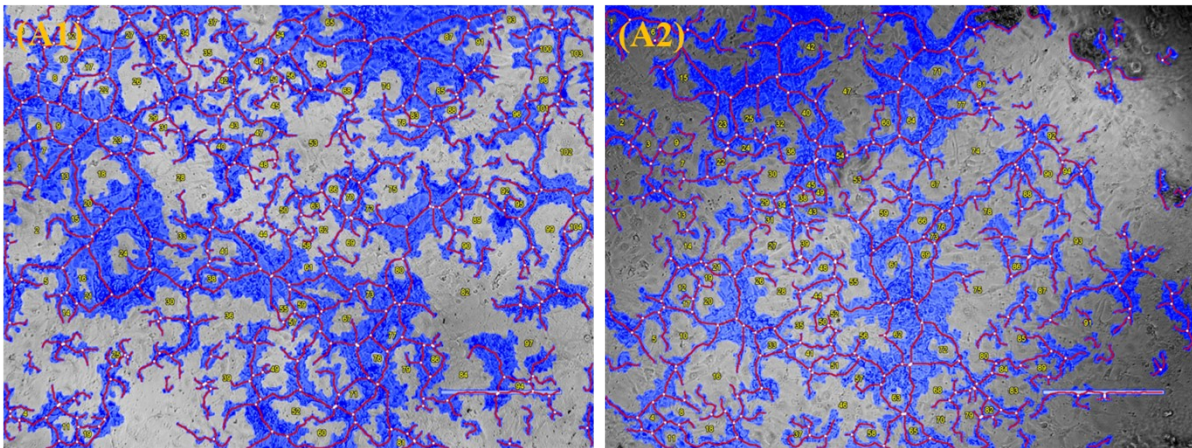

**Figure S2.** *In vitro* tube formation in (A1) PBS and (A2) MNPs treated bEnd.3 cells. Scale bar = 400  $\mu\text{m}$ .

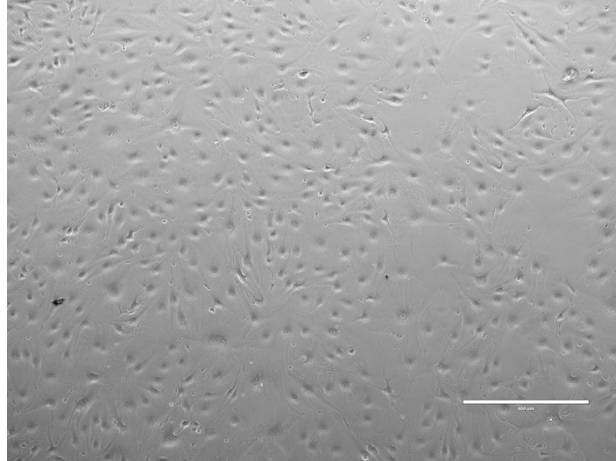

**Figure S3.** Morphology of bEnd.3 cells grown as monolayer. Scale bar = 400  $\mu\text{m}$ .

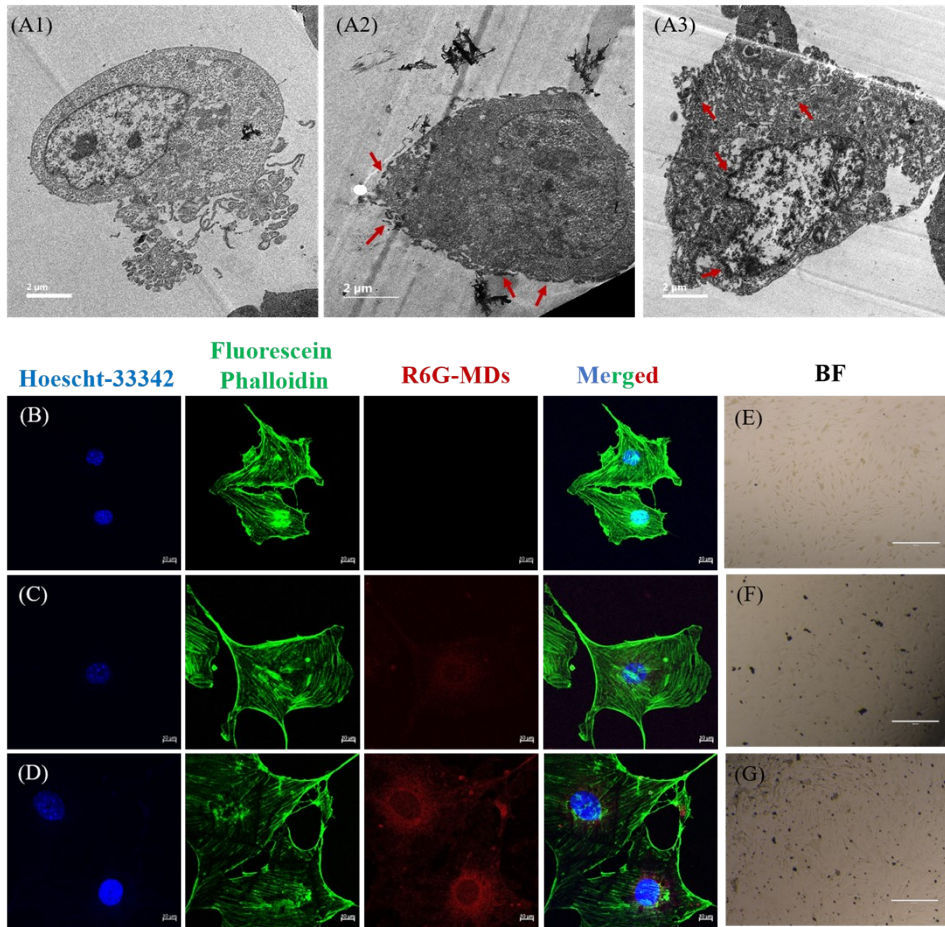

**Figure S4.** Cell association assay. (A) TEM image analysis of (A1) PBS (Control), (A2) Cells 1 h post-MNPs incubation and (A3) Cells 24 h post-MNPs incubation. Scale bar = 2  $\mu\text{m}$ . Red arrows indicate the presence of MNPs. (B-D) Confocal microscopy (Scale bar = 10  $\mu\text{m}$ ) and (E-G) Prussian Blue staining (Scale bar = 200  $\mu\text{m}$ ) of bEnd.3 cells treated with (B, E) PBS (Control); (C,F) MNPs alone; (D,G) MNPs under the influence of 1.2 kOe EMF.

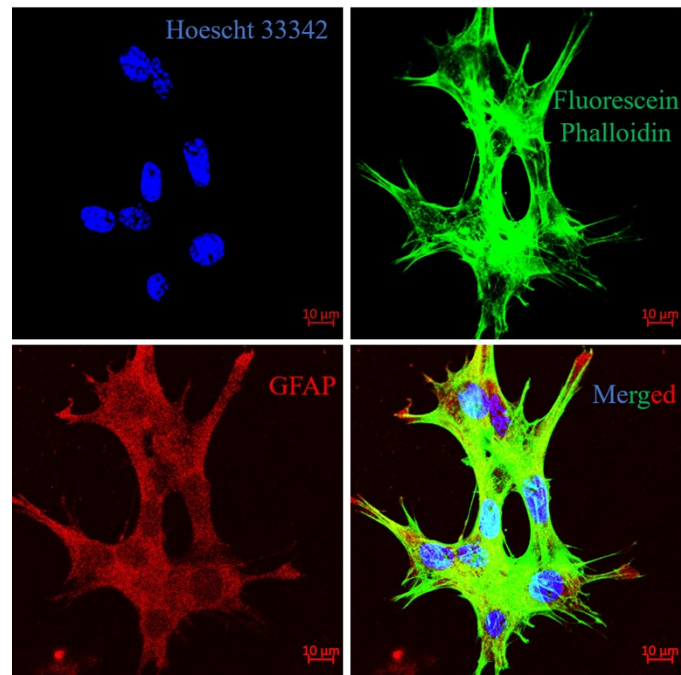

**Figure S5.** C8-D1A cells. Nuclei is stained blue using Hoescht-33342; cytoskeletal is stained green using Fluorescein phalloidin and astrocytic marker GFAP is presented in red. Scale bar = 10  $\mu\text{m}$ .

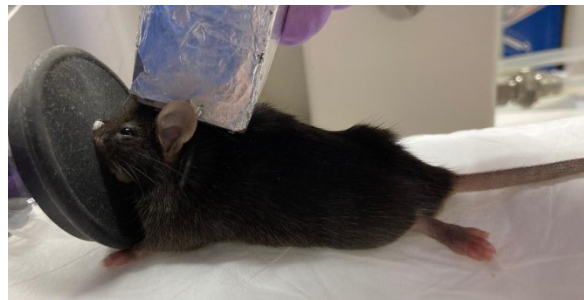

**Figure S6.** External magnetic field-guided delivery of MNPs across the BBB.

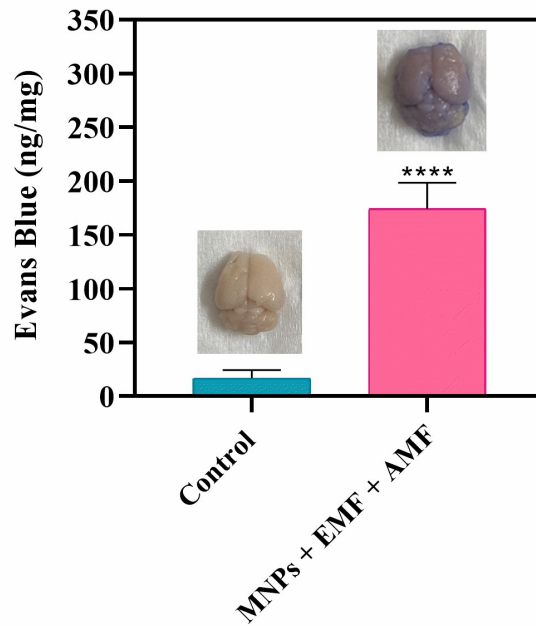

**Figure S7.** Evans Blue dye permeabilization across the blood-brain barrier following the dual-targeting strategy. \*\*\*\* $p < 0.0001$  were considered statistically significant.

**Table S1.** Sequences of primers used for determining TJ proteins at BBB.

| Gene      | Forward primer                    | Reverse primer                     |
|-----------|-----------------------------------|------------------------------------|
| ZO-1      | 5' – TTTTGTCCCACTTGAATCCC<br>- 3' | 5' - AGCTCTTGGGTCATGCACTT -<br>3'  |
| Claudin-1 | 5' – CTTGTTTGCAGAGACCCCAT<br>- 3' | 5' - CAATGACAGCCATCCACATC<br>- 3'  |
| Caudin-5  | 5' –<br>CTGGACCACAACATCGTGAC - 3' | 5' - GTA CTTGACCGGGAAGCTGA<br>- 3' |
| GAPDH     | 5' – AGACAGCCGCATCTTCTTGT<br>- 3' | 5' - CTTGCCGTGGGTAGAGTCAT<br>- 3'  |
